# Supplementary material
Source: HighWire-hosted journal article supplement (https://bmjopen.bmj.com/content/7/8/e016439)
Supplement: inline-supplementary-material-1 [file inline-supplementary-material-1.pdf]

## Supplementary Material 1: Sensitivity analysis

### Influence of assumed cancer prevalence rate in symptomatic patients

We conducted a series of sensitivity analyses in which we tested our assumption about the underlying prevalence of cancer in patients presenting to their GPs. We thus selected a range of prevalence rates (1.5%, 3% and 4%) and used the reciprocals of these values (66, 33 and 25 respectively) to multiply by the number of cancers to provide estimates of the total number of patients with symptoms possibly indicative of cancer and thus estimate the number of true negatives per practice.

### Influence of lower limit of practice size for inclusion in the analysis

We also tested the sensitivity of the results to the lower limit of practice size which was eligible for inclusion in the analysis. In supplementary table 1 we report the sensitivity and specificity of the summary point from a bivariate meta-analysis based on each prevalence rate and lower limit of practice size for inclusion.

**Supplementary Table ST1 Sensitivity analysis of influence of (a) lower limit for number of cancers per practice over 5 years and (b) different assumed prevalence of cancer in symptomatic patients on sample size, sensitivity and specificity.**

| Lower limit of number of cancers | Sample size |                   | Sensitivity <sup>1</sup> | Specificity                  |              |       |       |
|----------------------------------|-------------|-------------------|--------------------------|------------------------------|--------------|-------|-------|
|                                  | Practices   | Patients          |                          | Assumed prevalence of cancer |              |       |       |
|                                  |             |                   |                          | 4%                           | 3%           | 2%    | 1.5%  |
| None                             | 7630        | 53,563,589        | -                        | -                            | -            | -     | -     |
| 5                                | 6705        | 50,974,927        | 47.6%                    | 84.1%                        | 88.1%        | 92.2% | 94.2% |
| 30                               | 5960        | 48,268,374        | 47.4%                    | 83.9%                        | 87.9%        | 92.2% | 94.1% |
| <b>50</b>                        | <b>5479</b> | <b>46,271,734</b> | <b>47.4%</b>             | 83.7%                        | <b>87.8%</b> | 92.1% | 94.0% |
| 100                              | 4445        | 41,198,188        | 47.3%                    | 83.7%                        | 87.8%        | 92.1% | 94.0% |
| 200                              | 2269        | 25,878,891        | 47.5%                    | 84.0%                        | 88.0%        | 92.2% | 94.1% |

1. Sensitivity and specificity relate to the summary point from bivariate meta-analysis of all eligible practices.
2. Values in bold indicate the values used and obtained in the primary analysis

**Table ST2 Sensitivity analysis of changing assumed cancer prevalence in symptomatic patients on workload for different quintiles of age-standardised referral rate. Data based on 1000 cancers per quintile**

|                                          | Cancer prevalence = 4% |             | Cancer prevalence = 3% |             | Cancer prevalence = 2% |             | Cancer prevalence = 1.5% |             |
|------------------------------------------|------------------------|-------------|------------------------|-------------|------------------------|-------------|--------------------------|-------------|
|                                          | Referral rate quintile |             | Referral rate quintile |             | Referral rate quintile |             | Referral rate quintile   |             |
|                                          | Lowest                 | Highest     | Lowest                 | Highest     | Lowest                 | Highest     | Lowest                   | Highest     |
| Obtained from data                       |                        |             |                        |             |                        |             |                          |             |
| Sensitivity                              | 42.8%                  | 50.6%       | 42.8%                  | 50.6%       | 42.8%                  | 50.6%       | 42.8%                    | 50.6%       |
| Specificity                              | 89.4%                  | 76.4%       | 92.0%                  | 82.4%       | 94.8%                  | 88.5%       | 96.1%                    | 91.4%       |
| Application of data to 1000 cancers      |                        |             |                        |             |                        |             |                          |             |
| Cancer + fast-track (true positive)      | 428                    | 506         | 428                    | 506         | 428                    | 506         | 428                      | 506         |
| Cancer, no fast-track (false negative)   | 572                    | 494         | 572                    | 494         | 572                    | 494         | 572                      | 494         |
| No cancer + fast-track (false positive)  | 2552                   | 5655        | 2548                   | 5639        | 2544                   | 5626        | 2542                     | 5623        |
| No cancer, no fast track (true negative) | 21448                  | 18345       | 29452                  | 26361       | 46456                  | 43374       | 62458                    | 59377       |
| Implications per 1000 cancers            |                        |             |                        |             |                        |             |                          |             |
| Total referrals                          | <b>2980</b>            | <b>6161</b> | <b>2976</b>            | <b>6145</b> | <b>2972</b>            | <b>6132</b> | <b>2970</b>              | <b>6129</b> |
| Additional fast-track referrals          |                        | 3181        |                        | 3169        |                        | 3160        |                          | 3159        |
| Additional cancers via fast-track        |                        | 78          |                        | 78          |                        | 78          |                          | 78          |

This sensitivity analysis only relates to moving from the lowest quintile to the highest quintile (the leftmost and rightmost data columns in table 4, not the cumulative effect of moving from all quintiles to the highest quintile.
